# Supplementary material
Source: Springer Nature journal article supplement (https://www.springermedizin.de/resource/supplementary/12883_2011_547_MOESM3_ESM.pdf/9455378)

**A**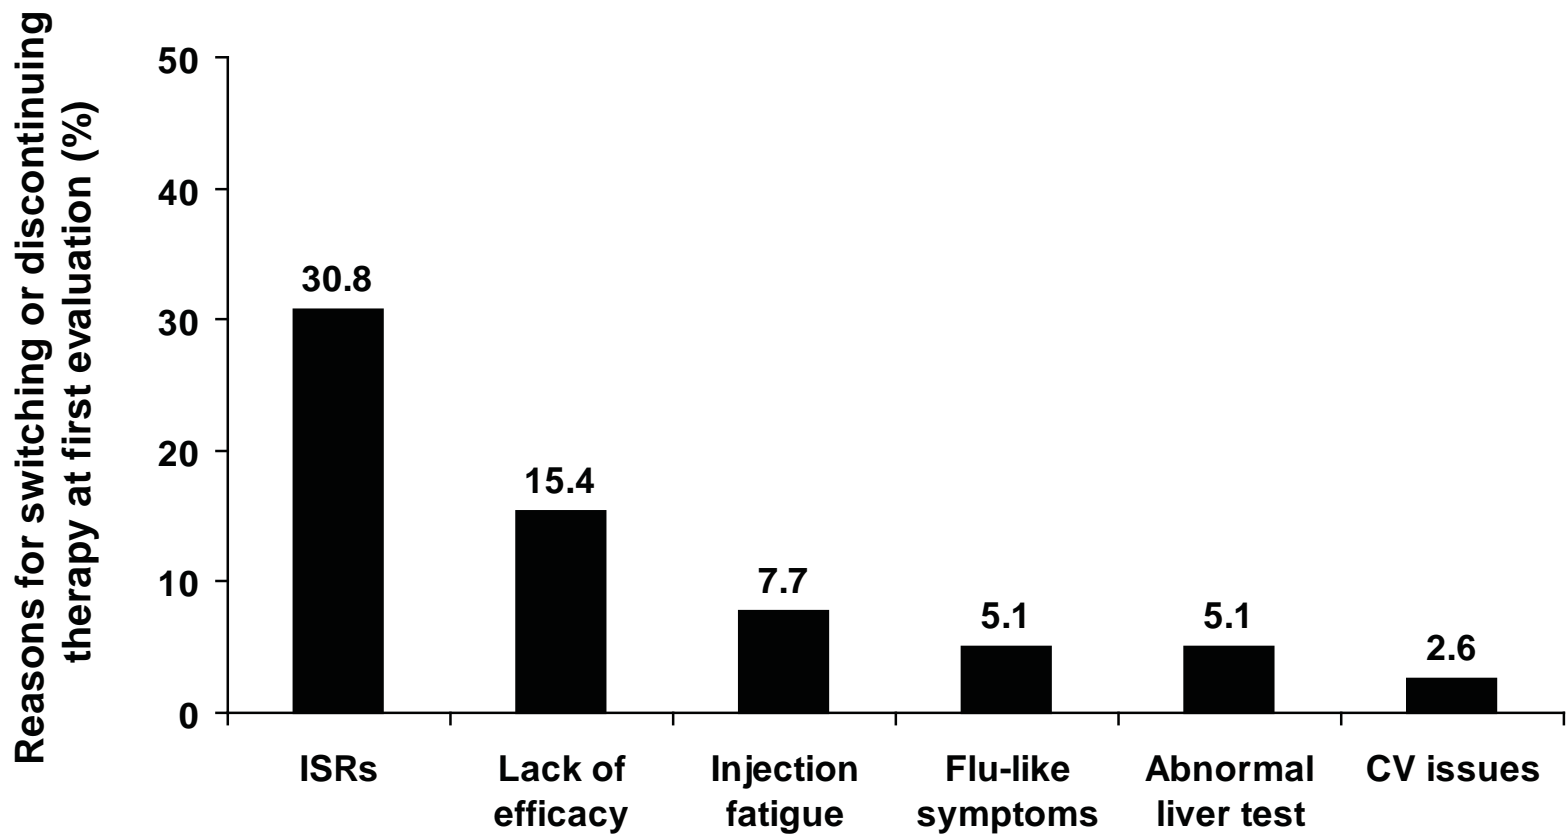

Abbreviations: CV, cardiovascular.

**B**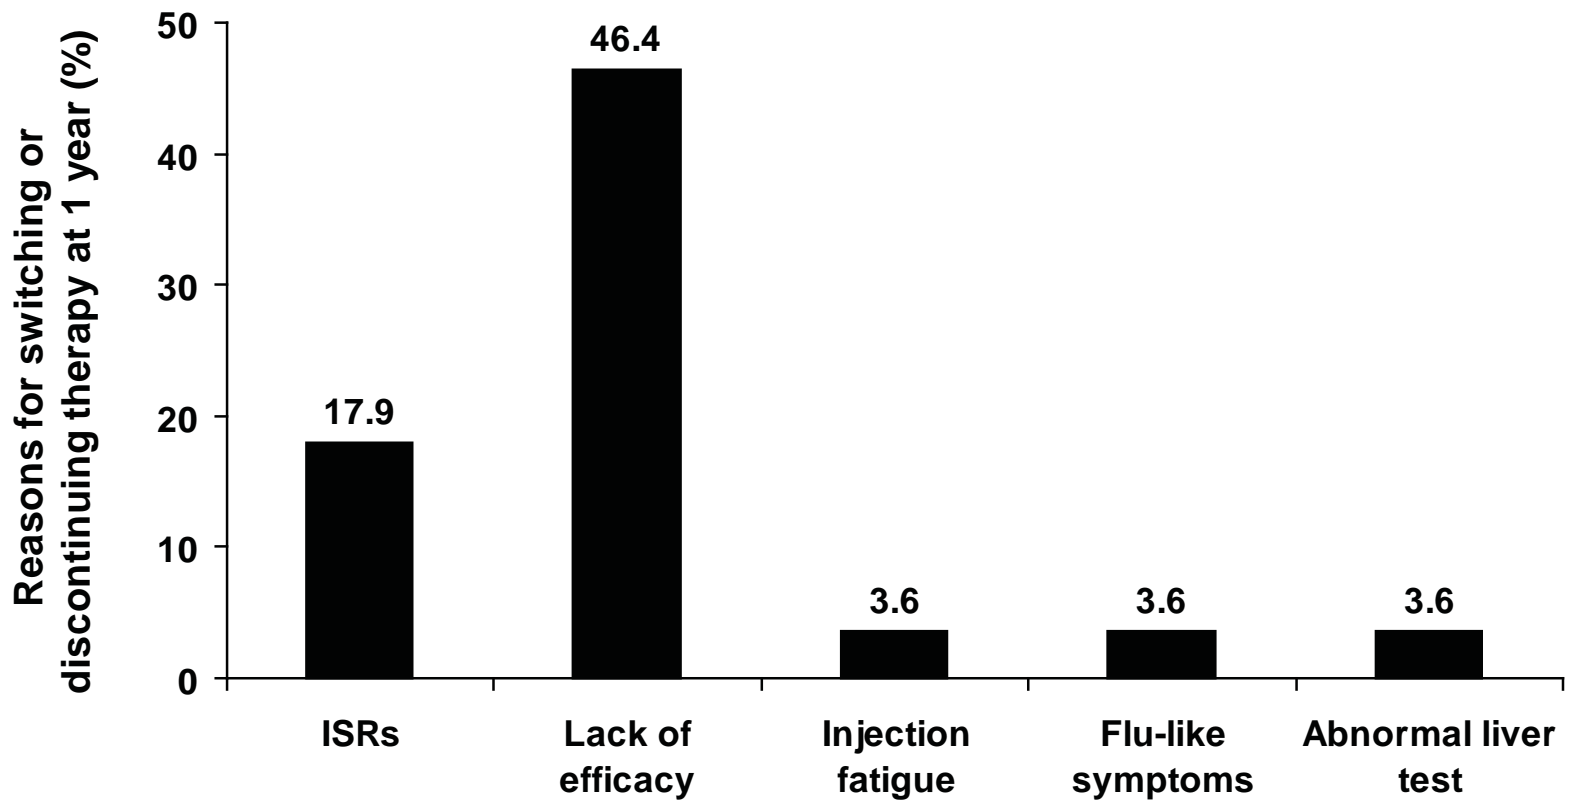

Supplement: MOESM3 [file 9455378]
